# Supplementary material for: High pre-diagnosis attrition among patients with presumptive MDR-TB: an operational research from Bhopal district, India
Source: BMC Health Serv Res. 2017 Apr 4;17:249. doi: 10.1186/s12913-017-2191-6 (PMC5379759; doi:10.1186/s12913-017-2191-6)
Supplement: Supplementary file 2 — Codebook/Data documentation sheet; Description of file: This file contains details of the fields including values (codes) and value labels. (XLSX 16 kb) [file 12913_2017_2191_MOESM2_ESM.xlsx]

## Sheet: Sheet1
sno	field name	field label	field type	field length	field values	value label	comments
1	pwd	password to start data entry	T	6			noenter, this is required to open rec file…. One will have to enter the password "igmcri" to open the rec file for data entry
1	secs	Time in seconds to enter one record	I	3			noenter field, Make appropriate commands in chk file		Codebook for variables to be collected for the Eligible presumptive MDR-TB patients Write idcode at top of every data collection sheet (Annexure 2 of protocol) Use the exact value labels given below while filling the data extraction form (Annexure 2)
2	idcode	Patient unique indentifer	T	9	____-____		no enter field, First four texts shall include site, next four texts will be the sno
3	sitecode	code of the site	T	4			noenter field, Make appropriate commands in chk file, after entry of site, sitecode will be generated
4	sno	serial no of data collection form at the site	I	4	####	9999-01-01	It has to be Unique. It cannot be missing (hence no option for missing)
5	site	study site	T	20	Alappuzha	ALAP	repeat check, external label block, after entry idcode to be generated.
					Anand	ANAN
					Bharuch	BHAR
					Chota Udepur	CHUD
					Dahod	DAHO
					Mahisagar	MAHI
					Narmada	NARM
					Panchmahal	PANC
					Vadodara R	VADR
					Vadodara Municipal Corporation	VADU
					Bengaluru city	BENU
					Bengaluru Rural	BENR
					Dakshina Kannada	DAKA
					Davangere	DAVA
					Gadag	GADA
					Mysuru	MYSU
					South Goa	SOGO
					Bhopal	BHOP
					Chandigarh	CHAN
					Kanchipuram	KANC
					Chennai	CHEN
					Vishakhapatnam	VIZG
6	doe	date of eligibility; date when the patient was identified as presumptive MDR-TB based on record review by the investigator	D	10	01/01/2014 to 31/12/2014, legal 01/01/1800 missing
7	critinv	Criteria based on which the investigator identified presumptive MDR-TB	I	1	1	Cat II - relapse
					2	Cat II - failure
					3	Cat II - default
					4	Cat II - others
					5	FUS+
					6	Cat I with TB-HIV
					7	Pul TB with MDR-TB contact
8	eptb	whether the case is extra pul TB	I	1	#	1 yes, 2 no, 9 missing
	spstat	baseline sputum status	I	1	#	1 positive, 2 negative, 9 missing
9	age	Patient's age in completed years	I	3	0-125		enter 999 for missing age
10	sex	Patient's sex	I	1	1	Male
					2	Female
					3	Others/transgender
					9	Not recorded
11	dmc	Designated Microscopy Centre where sputum was tested	T	20			External label block to be used. Reverse coding to be done. During analysis, dmc may be recoded as dmc_r (Govt chest clinic, PHC/CHCs, medical college)
12	tbregno	TB registration number	I	4	1-9998, legal values 9999 missing		Use F5 command to open a box to write the reason for missing (whether missing or repeat value). Give appropriate entry so that one can refer back to the original record in TB treatment register.
13	regdate	date of patient TB registration	I	4	01/07/2013 to 31/03/2015, 01/01/1800 missing
					2	Follow up Sp+
					3	Patient is a MDR-TB contact
14	dstref	Whether the eligible was identified and referred for DST	I	1	1	Yes	if dstref=2 then dstrefdt=01/01/2000, irlsprec=8, irlrecdt=01/01/2000, irltest=8, irltestdt=01/01/2000, irldstres=8, irlresdt=01/01/2000, drtbref=8,drtbrefdt=01/01/2000, dotplus=8, trtdt=01/01/2000
					2	No
15	dstrefdt	Date of referral for CDST	D	10	01/01/2014 to 31/03/2015 legal values		enter 01/01/2000 for not applicable, if dstref=1 then dstrefdt<>01/01/2000
					01/01/2000 not applicable
16	irlsprec	Whether Sputum sample was received by IRL	I	1	1	Yes	if irlsprec=2 then irlrecdt=01/01/2000, irltest=8, irltestdt=01/01/2000, irldstres=8, irlresdt=01/01/2000, drtbref=8,drtbrefdt=01/01/2000, dotplus=8, trt_dt=01/01/2000
					2	No
					8	not applicable
					9	Not recorded
17	irlrecdt	Date of sputum receipt at IRL	D	10	01/01/2014 to 31/03/2015 legal values		if irlsprec=1 then irlrecdt<>8
					01/01/2000 not applicable		enter 01/01/2000 for not applicable
					01/01/1800 missing dates		enter 01/01/1800 for missing dates
18	irltest	Whether LPA testing was done or not	I	1	1	Yes	if irltest=2 then irltestdt=01/01/2000, irldstres=8, irlresdt=01/01/2000, drtbref=8,drtbrefdt=01/01/2000, dotplus=8, trt_dt=01/01/2000
					2	No
					8	not applicable
					9	Not recorded
19	irltestdt	Date of LPA testing at IRL	D	10	01/01/2014 to 31/03/2015 legal values		if irltest=1 then irltestdt<>01/01/2000
					01/01/2000 not applicable
					01/01/1800 missing dates
20	irldstres	DST result at IRL	I	1	1	MDR pos	if irldstres=2 then irlresdt=01/01/2000, drtbref=8,drtbrefdt=01/01/2000, dotplus=8, trt_dt=01/01/2000
					2	MDR neg
					8	not applicable
					9	not recorded
21	irlresdes	Despatch of DST result from IRL to DTC	I	1	1	Yes
					2	No
					8	Not applicable
					9	Not recorded
22	irlresdt	Date of sending LPA report from IRL	D	10	01/01/2014 to 30/06/2015 legal values		if irldstres=1 then irlresdt<>01/01/2000
					01/01/2000 not applicable		enter 01/01/2000 for not applicable; in situations where irlsprec=0 or 8
					01/01/1800 missing dates		enter 01/01/1800 for missing dates
23	drtbref	Whether patient was referred to DR-TB centre from DTC	I	1	1	Yes	if drtbref=2 then drtbrefdt=01/01/2000, dotplus=8, trt_dt=01/01/2000
					2	No
					8	not applicable
					9	not recorded
24	drtbrefdt	Date of referral to DR-TB center from DTC	D	10	01/01/2014 to 30/09/2015 legal values		if drtbref=1 then drtbrefdt<>01/01/2000
					01/01/2000 not applicable		enter 01/01/2000 for not applicable
					01/01/1800 missing dates		enter 01/01/1800 for missing dates
25	dotsplus	Whether patient was initiated on DOTS-PLUS	I	1	1	Yes	if dotplus=2 then trt_dt=8
					2	No
					8	not applicable
					9	not recorded
26	trtdt	Date of iniitation on DOTS PLUS		10	01/01/2014 to 30/09/2015 legal values		if dotsplus=1 then trt_dt<>01/01/2000
					01/01/2000 not applicable		enter 01/01/2000 for not applicable
					01/01/1800 missing dates		enter 01/01/1800 for missing dates
